# Supplementary material
Source: MDPI journal article supplement (https://www.mdpi.com/2308-3417/5/4/96)
Supplement: s1 [file s1]

## Quality of Life Questionnaire: Urinary incontinence

### Presentation

Sex: ☐ M ☐ F      Age: \_\_\_\_\_      Occupation: \_\_\_\_\_

Weight: \_\_\_\_\_      Height: \_\_\_\_\_      Body Mass Index (BMI): \_\_\_\_\_

Education: ☐ Primary;

☐ Secondary;

☐ High;

☐ Higher.

- Do you perform physical activity regularly? ☐ Yes    ☐ No

- Which one of these pathologies you have?

☐ Arterial hypertension

☐ Oncologic pathologies

☐ Spinal cord pathologies

☐ Urogenital prolapse

(e.g. bladder or prostate  
tumor)

(e.g. herniated disk, injuries,  
syringomyelia etc.)

☐ Prostatic hypertrophy

☐ Diabetes

☐ Urinary system  
infections

☐ Constipation

☐ Multiple sclerosis

☐ Kidney stones

☐ Parkinson disease

☐ Overactive bladder

☐ Urethra stenosis

☐ Stroke

☐ Spina bifida

☐ Alzheimer disease

☐ Hormonal alterations

- Sign eventual operations or other conditions that caused and hospitalization in the last years, indicating the date:

Date

Operation / Hospitalization

\_\_\_\_\_

\_\_\_\_\_

\_\_\_\_\_

\_\_\_\_\_

- Do you take one of these drugs?

☐ Diuretics

☐ Sedatives

☐ None of these

☐ Laxatives

☐ Muscle relaxants

- Do you walk autonomously? ☐ Yes    ☐ No

- For how much time have you been suffering of urinary incontinence?

- ☐ Few weeks                      ☐ Just over 1 years                      ☐ More than 5 years  
☐ Less than an year                      ☐ Between 2 and 5 years

- How often do you use bathroom per day?

- ☐ Less than 6                      ☐ 10-15  
☐ 6-10                      ☐ More than 15

- When, during the day, do you leak urine?

- ☐ Episodes during the day                      ☐ Episodes during the night                      ☐ Day and night

- How often do you leak urine?

- ☐ Rarely                      ☐ One time at day  
☐ One or more times at week                      ☐ More than one time at day

- Select how much urine you lose every day, using as measure a size M absorbent (70 – 120 cm of hip and weight between 40 and 70 kg):

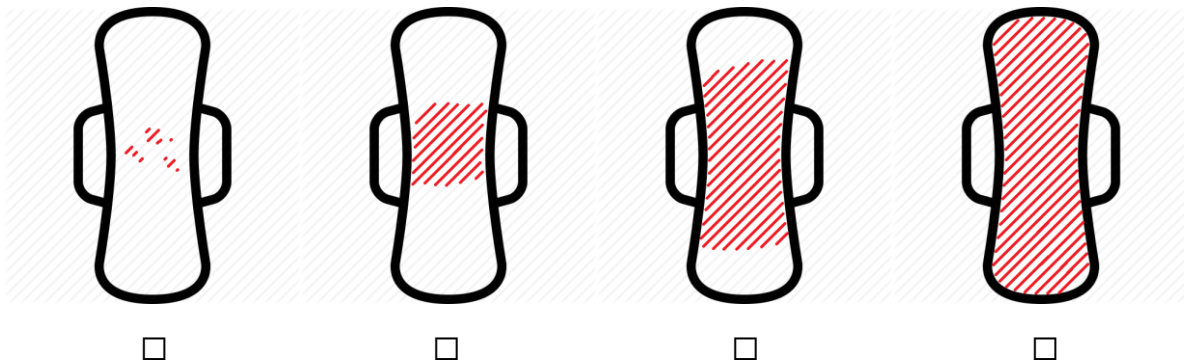

- Have you ever felt like your bladder is not completely empty after used the toilet?

- ☐ Yes    ☐ No    ☐ Always

- Can you feel the stimulus of urination? ☐ Yes    ☐ No

- When urination is started can you arrest it? ☐ Yes    ☐ No

- In which of these circumstances do you leak urine? You can mark more than one answer.

- |                                                        |                                                        |
|--------------------------------------------------------|--------------------------------------------------------|
| <input type="checkbox"/> Before reaching the bathroom; | <input type="checkbox"/> During physical activity;     |
| <input type="checkbox"/> When I cough or sneeze;       | <input type="checkbox"/> Once dressed after urination; |
| <input type="checkbox"/> During the sleep;             | <input type="checkbox"/> Without any particular reason |

- Do you use one of these aids?

- ☐ None    ☐ Traverse    ☐ Absorbent    ☐ Diaper    ☐ Catheter

- How many changes of underwear/aids you make per day?

- ☐ 1 at day (24h)    ☐ 2 at day    ☐ 3 at day    ☐ more than 3 at day

- Sign which of these treatments you have proved against urinary incontinence:

- |                                                |                                          |
|------------------------------------------------|------------------------------------------|
| <input type="checkbox"/> Pelvic floor gym      | <input type="checkbox"/> Botulinum toxic |
| <input type="checkbox"/> Anticholinergic drugs | <input type="checkbox"/> Other           |
| <input type="checkbox"/> Topical estrogens     | <input type="checkbox"/> None            |
| <input type="checkbox"/> Imipramine assumption |                                          |

- The treatments signed by you have improved you condition? ☐ Yes    ☐ No

---

Part dedicated to women

- Sign for each childbirth you had, if natural or cesarean, and specify if there have been difficulties:

|                                             | Natural                  | Caesarean                |  | Normal                   | Hard                     |
|---------------------------------------------|--------------------------|--------------------------|--|--------------------------|--------------------------|
| <input type="checkbox"/> I never gave birth | //                       | //                       |  | //                       | //                       |
| <b>Childbirth N° 1</b>                      | <input type="checkbox"/> | <input type="checkbox"/> |  | <input type="checkbox"/> | <input type="checkbox"/> |
| <b>Childbirth N° 2</b>                      | <input type="checkbox"/> | <input type="checkbox"/> |  | <input type="checkbox"/> | <input type="checkbox"/> |
| <b>Childbirth N° 3</b>                      | <input type="checkbox"/> | <input type="checkbox"/> |  | <input type="checkbox"/> | <input type="checkbox"/> |
| <b>Childbirth N° 4</b>                      | <input type="checkbox"/> | <input type="checkbox"/> |  | <input type="checkbox"/> | <input type="checkbox"/> |
| <b>Childbirth N° 5</b>                      | <input type="checkbox"/> | <input type="checkbox"/> |  | <input type="checkbox"/> | <input type="checkbox"/> |
| <b>Childbirth N° 6</b>                      | <input type="checkbox"/> | <input type="checkbox"/> |  | <input type="checkbox"/> | <input type="checkbox"/> |
| <b>Childbirth N° 7</b>                      | <input type="checkbox"/> | <input type="checkbox"/> |  | <input type="checkbox"/> | <input type="checkbox"/> |
| <b>Childbirth N° 8</b>                      | <input type="checkbox"/> | <input type="checkbox"/> |  | <input type="checkbox"/> | <input type="checkbox"/> |
| <b>Childbirth N° 9</b>                      | <input type="checkbox"/> | <input type="checkbox"/> |  | <input type="checkbox"/> | <input type="checkbox"/> |
| <b>Childbirth N° 10</b>                     | <input type="checkbox"/> | <input type="checkbox"/> |  | <input type="checkbox"/> | <input type="checkbox"/> |

## Part dedicated to clinicians

Type of incontinence:

- ☐ Urgency urinary incontinence
- ☐ Stress-urinary incontinence
- ☐ Mixed urinary incontinence
- ☐ Overflow urinary incontinence
- ☐ Functional urinary incontinence

Severity:

| Item                                      | Score |   |   |   |   |     |
|-------------------------------------------|-------|---|---|---|---|-----|
| Deambulation autonomy                     | 0     |   |   |   | 5 |     |
| Urination frequency                       | 0     | 1 | 2 | 3 |   |     |
| When does he/she have leaks (day/night)   |       | 1 | 2 |   |   |     |
| Leaks frequency                           |       | 1 | 2 | 3 | 4 |     |
| Quantity of urine he/she leaks            |       | 1 | 2 | 3 | 4 |     |
| Sphincter control during urination        | 0     | 1 |   |   |   |     |
| Circumstances in which he/she loses urine |       | 1 | 2 | 3 | 4 | 5 6 |
| Absorbent aid used                        | 0     | 1 | 2 | 3 |   |     |
| Changes made every day                    |       | 1 | 2 | 3 | 4 |     |

Total score: \_\_\_\_\_ / 32

### Quality of Life questionnaire

|                                                                                                                         | Not at all               | A little                 | Moderately               | Very much                |
|-------------------------------------------------------------------------------------------------------------------------|--------------------------|--------------------------|--------------------------|--------------------------|
| 1. Are you worried about wetting yourself because of leaks?                                                             | <input type="checkbox"/> | <input type="checkbox"/> | <input type="checkbox"/> | <input type="checkbox"/> |
| 2. Are you worried about sneezing or coughing because of your incontinence?                                             | <input type="checkbox"/> | <input type="checkbox"/> | <input type="checkbox"/> | <input type="checkbox"/> |
| 3. When you visit new places, knowing the location of the bathroom does it worry you?                                   | <input type="checkbox"/> | <input type="checkbox"/> | <input type="checkbox"/> | <input type="checkbox"/> |
| 4. Are you worried about not to reach on time to the bathroom?                                                          | <input type="checkbox"/> | <input type="checkbox"/> | <input type="checkbox"/> | <input type="checkbox"/> |
| 5. Are you worried about leaving home for long time?                                                                    | <input type="checkbox"/> | <input type="checkbox"/> | <input type="checkbox"/> | <input type="checkbox"/> |
| 6. Are you worried about moving using public transport?                                                                 | <input type="checkbox"/> | <input type="checkbox"/> | <input type="checkbox"/> | <input type="checkbox"/> |
| 7. Do you feel frustrated because incontinence doesn't allow you to do what you want?                                   | <input type="checkbox"/> | <input type="checkbox"/> | <input type="checkbox"/> | <input type="checkbox"/> |
| 8. Are you worried about the smell you may emit?                                                                        | <input type="checkbox"/> | <input type="checkbox"/> | <input type="checkbox"/> | <input type="checkbox"/> |
| 9. Do you ever feel ashamed?                                                                                            | <input type="checkbox"/> | <input type="checkbox"/> | <input type="checkbox"/> | <input type="checkbox"/> |
| 10. Does your incontinence limit your clothes choices?                                                                  | <input type="checkbox"/> | <input type="checkbox"/> | <input type="checkbox"/> | <input type="checkbox"/> |
| 11. Do you feel like you have no control on your life?                                                                  | <input type="checkbox"/> | <input type="checkbox"/> | <input type="checkbox"/> | <input type="checkbox"/> |
| 12. Have you ever felt unable to enjoy the meetings with your friends?                                                  | <input type="checkbox"/> | <input type="checkbox"/> | <input type="checkbox"/> | <input type="checkbox"/> |
| 13. Does the incontinence interfere with your relation stability?                                                       | <input type="checkbox"/> | <input type="checkbox"/> | <input type="checkbox"/> | <input type="checkbox"/> |
| 14. Does the urinary incontinence limit your participation to social activities outdoor?                                | <input type="checkbox"/> | <input type="checkbox"/> | <input type="checkbox"/> | <input type="checkbox"/> |
| 15. Do you think your clinicians are disinterested about your health worries?                                           | <input type="checkbox"/> | <input type="checkbox"/> | <input type="checkbox"/> | <input type="checkbox"/> |
| 16. Did urinary incontinence have a negative economic impact upon your life?                                            | <input type="checkbox"/> | <input type="checkbox"/> | <input type="checkbox"/> | <input type="checkbox"/> |
| 17. Have you ever felt socially excluded?                                                                               | <input type="checkbox"/> | <input type="checkbox"/> | <input type="checkbox"/> | <input type="checkbox"/> |
| 18. Does your health alter relations with your family?                                                                  | <input type="checkbox"/> | <input type="checkbox"/> | <input type="checkbox"/> | <input type="checkbox"/> |
| 19. Do you feel like a weight to others?                                                                                | <input type="checkbox"/> | <input type="checkbox"/> | <input type="checkbox"/> | <input type="checkbox"/> |
| 20. Do you feel discomfort to communicate with other? (talking, writing, listening, being understood and understanding) | <input type="checkbox"/> | <input type="checkbox"/> | <input type="checkbox"/> | <input type="checkbox"/> |
| 21. Do you feel discomfort to meet and to interact with new people?                                                     | <input type="checkbox"/> | <input type="checkbox"/> | <input type="checkbox"/> | <input type="checkbox"/> |
| 22. Does urinary incontinence interfere with your sexual desire or interest?                                            | <input type="checkbox"/> | <input type="checkbox"/> | <input type="checkbox"/> | <input type="checkbox"/> |

|                                                                                                     | Not at all               | A little                 | Moderately               | Very much                |
|-----------------------------------------------------------------------------------------------------|--------------------------|--------------------------|--------------------------|--------------------------|
| 23. Do you consider yourself unsatisfied about your sexual relationship with your partner?          | <input type="checkbox"/> | <input type="checkbox"/> | <input type="checkbox"/> | <input type="checkbox"/> |
| 24. Do thoughts about your health interfere with your sexual life?                                  | <input type="checkbox"/> | <input type="checkbox"/> | <input type="checkbox"/> | <input type="checkbox"/> |
| 25. Does the urinary incontinence modify into negative your body image?                             | <input type="checkbox"/> | <input type="checkbox"/> | <input type="checkbox"/> | <input type="checkbox"/> |
| 26. Do the leaks interfere with your housework like cooking, ironing, washing etc.?                 | <input type="checkbox"/> | <input type="checkbox"/> | <input type="checkbox"/> | <input type="checkbox"/> |
| 27. Do the leaks interfere with your physical activities like jogging, swimming or working out?     | <input type="checkbox"/> | <input type="checkbox"/> | <input type="checkbox"/> | <input type="checkbox"/> |
| 28. Do the leaks interfere with your hobbies like reading, watching movies, writing, painting etc.? | <input type="checkbox"/> | <input type="checkbox"/> | <input type="checkbox"/> | <input type="checkbox"/> |
| 29. Do the leaks interfere with your religious and/or spiritual activities?                         | <input type="checkbox"/> | <input type="checkbox"/> | <input type="checkbox"/> | <input type="checkbox"/> |
| 30. Have you ever felt discomfort on the work place?                                                | <input type="checkbox"/> | <input type="checkbox"/> | <input type="checkbox"/> | <input type="checkbox"/> |
| 31. Does your health interfere with your work performance?                                          | <input type="checkbox"/> | <input type="checkbox"/> | <input type="checkbox"/> | <input type="checkbox"/> |
| 32. Have you ever felt depressed?                                                                   | <input type="checkbox"/> | <input type="checkbox"/> | <input type="checkbox"/> | <input type="checkbox"/> |
| 33. Have you ever felt oppressed by anxiety?                                                        | <input type="checkbox"/> | <input type="checkbox"/> | <input type="checkbox"/> | <input type="checkbox"/> |
| 34. Does the urinary incontinence force you to wake you up many times during the night?             | <input type="checkbox"/> | <input type="checkbox"/> | <input type="checkbox"/> | <input type="checkbox"/> |
| 35. Do you pay attention to how much you drink when you are not home?                               | <input type="checkbox"/> | <input type="checkbox"/> | <input type="checkbox"/> | <input type="checkbox"/> |

Total score: \_\_\_\_\_ / 140
